# Supplementary material for: Quantitative monitoring of the removal of non-encapsulated material external to filled carbon nanotube samples
Source: Royal Society of Chemistry journal article supplement (doi:10.1039/c5cp04664e), 2015-01-01
Supplement: c5cp04664e1.pdf [file c5cp04664e1.pdf]

## - Supplementary Information -

### Quantitative monitoring of the removal of non-encapsulated material external to filled carbon nanotube samples

Markus Martincic,<sup>a</sup> Elzbieta Pach,<sup>b</sup> Belén Ballesteros<sup>b</sup> and Gerard Tobias<sup>a</sup>

a. Institut de Ciència de Materials de Barcelona (ICMAB-CSIC), Campus de la UAB, 08193 Bellaterra, Barcelona, Spain. E-mail: gerard.tobias@icmab.es; Tel. +34 935 801 853, Fax. +34 935 805 729

b. Catalan Institute of Nanoscience and Nanotechnology (ICN2), CSIC and The Barcelona Institute of Science and Technology, Campus UAB, Bellaterra, 08193 Barcelona, Spain

**Table S1** – TGA residue with the corresponding filling yield (FY) of samples of SmCl<sub>3</sub> filled carbon nanotubes free of external SmCl<sub>3</sub>. The TGA analysis was performed under flowing air. The same sample is marked (•). The iron content in the samples was calculated from the initial value of iron in empty single-walled carbon nanotubes (1.5 wt% of iron). The samples detailed below correspond to those analyzed in Figure 4; see Fig.4 caption for the detailed list of parameters employed.

|                                          | Washing | Residue/wt. % | FY/wt. % | Fe/wt. % |
|------------------------------------------|---------|---------------|----------|----------|
| Time of stirring ( <i>t</i> )            | 10 min• | 15.8          | 20.9     | 1.2      |
|                                          | 1 h     | 15.4          | 20.3     | 1.3      |
|                                          | 1 day   | 15.4          | 20.2     | 1.3      |
| Temperature ( <i>T</i> )                 | 50 °C   | 16.7          | 22.2     | 1.2      |
|                                          | 80 °C•  | 15.8          | 20.9     | 1.2      |
|                                          | 110 °C  | 16.2          | 21.5     | 1.2      |
| Volume ( <i>V</i> )                      | 50 mL   | 16.2          | 21.4     | 1.2      |
|                                          | 100 mL• | 15.8          | 20.9     | 1.2      |
|                                          | 200 mL  | 16.1          | 21.2     | 1.2      |
| Sonication time ( <i>t<sub>s</sub></i> ) | 0 min•  | 15.8          | 20.9     | 1.2      |
|                                          | 5 min   | 15.8          | 20.8     | 1.2      |
|                                          | 10 min  | 15.4          | 20.2     | 1.3      |

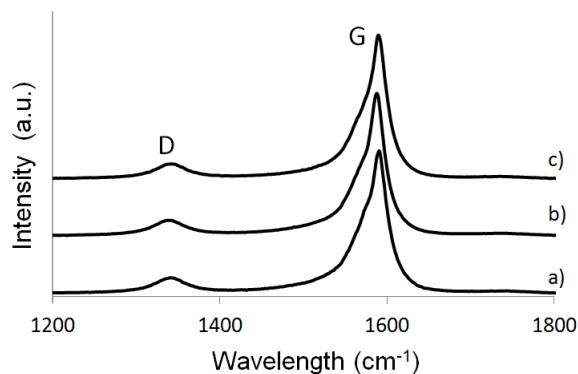

**Fig. S1** – Raman spectra of  $\text{SmCl}_3$  filled carbon nanotube samples cleaned a) without sonication, b) with 5 min sonication and c) with 10 min of sonication. The D to G band intensity ratio ( $I_D/I_G$ ) of the samples is: non-sonicated:  $0.123 \pm 0.011$ ; after 5 min sonication:  $0.129 \pm 0.025$ ; after 10 min sonication:  $0.125 \pm 0.025$ .

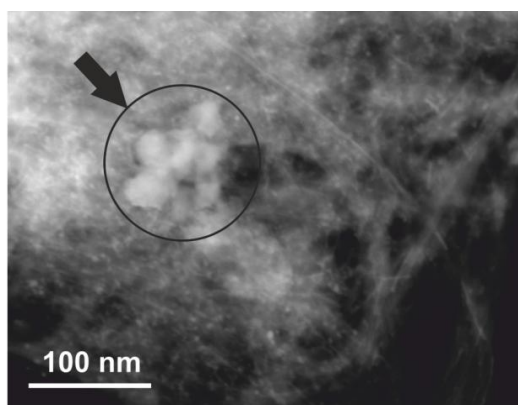

**Fig. S2** – HAADF STEM image of  $\text{SmCl}_3$  filled single-walled carbon nanotubes after partial washing, showing both the presence of external material (in the black circle where the arrow is pointing) and filling of carbon nanotubes (white strings).

### Determination of the filling yield:

The filling yield (FY) can be calculated knowing the amount of iron in empty nanotubes<sup>[1]</sup>:

$$\text{FY}(\text{wt}\%) = \frac{100 \times (R_2 - R_1)}{R_A - R_1}$$

where  $R_1$  and  $R_2$  represent TGA residues of empty and filled carbon nanotubes respectively, while  $R_A$  can be calculated knowing the stoichiometry of the oxidative reaction which is taking place during the TGA analysis:

$$R_A = \frac{100 \times y \times M_B}{x \times M_A}$$

Where  $M_A$  and  $M_B$  are molecular weights of A and B, while  $x$  and  $y$  are the reaction stoichiometric constants.

After burning the sample for TGA analysis, if the sample is not properly washed, the samarium(III) oxide content can be higher than expected due to the presence of external material that gives rise to false positive values.

[1] Ballesteros B, Tobias G, Ward MAH, Green MLH. Quantitative Assessment of the Amount of Material Encapsulated in Filled Carbon Nanotubes. *Journal of Physical Chemistry C* 2009;113:2653-6.
